# Supplementary material for: Physical Activity-Related Profiles of Female Sixth-Graders Regarding Motivational Psychosocial Variables: A Cluster Analysis Within the CReActivity Project
Source: Front Psychol. 2020 Nov 11;11:580563. doi: 10.3389/fpsyg.2020.580563 (PMC7686241; doi:10.3389/fpsyg.2020.580563)
Supplement: Supplementary file 3 [file Data_Sheet_1.CSV]

MVPA	AuSupp	ComSupp	RelSupp	AuPE	ComPE	RelPE	AuLT	ComLT	RelLT	Amo	External	Introjected	Identified	Intrinsic	Self_efficacy	SSFriends	SSfamilies	Age	BMI	SES	Cluster	cluster3
30,68	3	3,333333333	3	2,75	2,5	3	3	3	2,5	1	1,5	2,333333333	3,5	4	2,75	1	1,25	12,06	18,87	33	1	1
32,27	2,666666667	3,666666667	3	3,5	4	4,25	4,25	3,25	2,5	3,25	2	1,333333333	3,25	4	3	1,333333333	2,75	11,33	20,64	35	1	1
34,24	3	2,666666667	3	2,75	2,75	3,75	4,5	2,75	1	1	2,5	1	2,5	2,75	1,625	1	1,5	11,23	999	43	1	1
35,33	3,666666667	3	3	3	3,25	4,25	4,75	3,25	3,25	1,5	1	1	3	4,75	2,5	1	3,333333333	11,2	999	56	3	2
35,55	4,666666667	4,333333333	4,666666667	4	4,5	4,25	4,5	4,25	4,25	1,25	1,75	2	4,25	5	4,25	4,5	3,5	11,3	21,45	69	5	3
38,39	3,333333333	4	3,333333333	2	2,5	3,25	3,25	2	3	1,5	4	2,666666667	2,25	3,25	2,625	1,333333333	2	11,39	24,18	33	1	1
42,36	3,666666667	4,666666667	4,333333333	3	3	3,25	3,5	3,5	2	1	1	1	3,5	4,5	4,25	3,333333333	2	11,06	17,16	48	2	2
44,67	5	5	5	5	5	5	5	4	5	1	4	5	5	5	5	5	5	12,83	17,5	16	6	3
45,43	3,666666667	3,666666667	4	3,25	3	4,75	5	3,5	4,5	1,25	2,25	3,333333333	3,75	3,75	2,25	1,333333333	2,75	11,4	19,52	45	2	2
45,57	3,333333333	3,333333333	3	3,75	5	4,5	5	4	4,25	1	1,75	2,666666667	3,75	4,75	2,625	2	1,5	12,71	999	36	4	2
46,09	2	3,666666667	3,666666667	2	2,25	3,5	3,25	1,75	1,5	2,5	1	1,333333333	1,5	2,25	2	1,333333333	1,25	11,93	15,61	64	1	1
46,37	3,333333333	4,666666667	4	3,75	4,5	4,75	5	5	2,5	1	1	1	4	5	4	2	3	11,67	19,78	45	5	3
46,76	4	4	4	2,75	4	4	4	4	4	1	1	1	2,5	5	4	3,666666667	3,25	11,85	16,48	51	5	3
46,89	3	5	4	2,75	2,25	4,75	5	2,75	4	1	1,25	2,5	4,25	3,5	4,285714286	3	2,666666667	11,86	13,32	41	2	2
48,57	4	4	4	3,75	4	4,75	4,25	4	4	1,25	1,5	1,666666667	3	3,75	4	3	4,5	999	999	70	5	3
48,71	1,333333333	3	3	2,5	4	4	4	3,333333333	3,25	1	1,25	1,5	4,25	4,25	3,333333333	2,666666667	3,75	12,49	19,22	63	3	2
49,59	3,333333333	3	3,666666667	3,25	3	4	4,75	3	3,75	1	2,25	2	2,75	3,25	4,375	1,333333333	1,5	11,75	31,36	47	1	1
49,79	2,333333333	2	3,333333333	2,25	5	4,5	4,75	4,5	3	1,75	1,5	1	4,75	4,75	4,25	3,666666667	2,5	11,42	19,56	71	3	2
49,85	3,333333333	3,333333333	3,666666667	2,25	2,5	3,5	2,25	2	2	2	2	1,666666667	2,75	2,75	2,625	1,666666667	2	11,77	19,74	55	1	1
50,28	5	5	4,666666667	4	4,75	4	5	5	4,25	1	1	3,333333333	3,25	4	5	3	2,25	11,9	21,21	33	5	3
50,62	2,666666667	2,666666667	2	2	2	2,75	3,75	2,75	2,25	1,5	1,25	3	4,25	3,333333333	2,375	1	2	11,99	25,09	68	1	1
51,08	3	3,333333333	3,666666667	3,75	3,25	4,25	4	3	1,25	1	1,25	2	3,25	4	3,25	1,666666667	3,75	12,08	18,79	33	2	2
51,1	3,333333333	3,666666667	4	2,5	2,25	3,75	3,5	3,25	2	1,5	2	2	3,5	3,25	2,5	1,333333333	1	11,5	17,36	29	1	1
51,2	1,5	2,333333333	4	3	2,333333333	3	3	2,666666667	2,25	1	1,5	2,333333333	3,5	3,5	4	1,333333333	1,333333333	11,43	20,88	33	1	1
51,31	4,333333333	5	5	3	5	5	5	4,75	3	2,25	2	1,333333333	2,75	5	2,5	2,666666667	1,75	11,66	18,74	49	2	2
51,45	5	4,666666667	5	4,25	2	3,5	5	2	2,5	1	1	2,333333333	4	3,5	3,375	4,333333333	4,75	12,83	18,07	16	2	2
51,72	3,333333333	4,333333333	3,666666667	1,75	3,25	3,5	4,25	3,75	3,75	1	1	2	4,5	4,75	2,375	2,333333333	2,25	12,24	16,43	17	3	2
52,26	4,333333333	3,666666667	3,333333333	3,5	4	4	4	3	2,75	1,75	1	2,666666667	3	4,5	2,875	2,666666667	2,5	11,83	999	999	2	2
52,4	3,333333333	3,333333333	3,333333333	3,75	4	4	3,5	3	3,5	1,25	2,5	2	3	3,25	3,375	2	2,25	11,16	29,01	51	1	1
52,5	3,666666667	4	3,666666667	3	3,5	4,25	5	3,25	4,75	1	1,5	3,666666667	4,25	5	4	2,333333333	2,75	12,01	21,79	53	6	3
53,29	4	4,666666667	4,666666667	3	3,25	5	3	2,75	2,5	1	1	1,666666667	3,75	5	4,75	1,666666667	2	999	999	999	2	2
53,31	3,333333333	4	3	3,25	3,25	3,5	3,75	4	4,5	1,5	1	2	3,75	4	3,125	2	1,75	11,69	19,26	47	3	2
53,4	2,666666667	2	2	2,75	2,5	2	3,75	1,75	3,75	1	2,75	4	4,75	3,75	2,125	1	1,25	999	23,11	49	1	1
53,44	2,666666667	3,333333333	4	2,75	3,25	3,75	5	3,5	2,25	2	1,5	1,333333333	3	3,75	3	2,666666667	2,666666667	11,3	19,77	999	1	1
53,49	3,5	3,666666667	4,333333333	2,5	3,25	3,75	4,5	3,333333333	3	1	2	2,333333333	3,5	4,25	3,428571429	1,5	2,5	11,52	22,24	55	2	2
54,23	3,666666667	3,666666667	3,333333333	3,75	4,25	3,5	5	4,5	4,5	1	1	1,333333333	2,75	4,75	4,375	3,666666667	3,25	999	999	999	5	3
54,66	2,666666667	4	3,333333333	1,75	4,5	5	5	5	3	1,5	1	1	1,5	3,5	2,75	2,333333333	2	11,44	20,08	47	2	2
54,71	5	5	5	3,666666667	4	4	5	4	1,5	1	1	1	4	4	4,5	2,666666667	4	11,64	15,8	70	5	3
54,72	4,333333333	4,333333333	4,666666667	4	3	4,25	4,5	4,5	4,25	1	1	2,333333333	3,25	3,5	4	4	3,25	12,87	20,78	66	5	3
54,81	3,666666667	3,666666667	3,333333333	3,25	3	3,5	3,25	2,75	3,5	1	2,25	1,333333333	2,75	3	3,375	3	3	11,36	15,74	43	1	1
54,91	4	3,333333333	3,666666667	2,5	1,75	4,5	3,5	1,5	1,75	1,666666667	1,5	2,333333333	3,25	3,25	3,875	2	1,75	11,75	999	42	1	1
54,98	4,333333333	5	5	3,75	4	5	4,25	4,5	4,5	1,25	2	1,333333333	3,5	4,5	3,625	2,666666667	3	12,61	22,36	70	5	2
55,01	3,333333333	4,666666667	4,333333333	3,5	3,75	4,25	5	4	4,75	2	4	4,333333333	5	4,75	3,875	1,666666667	2,5	11,21	25,72	41	6	3
55,61	2,333333333	3,5	4	2,666666667	2,666666667	4	3,75	2,5	3,333333333	1,75	2,25	2,333333333	3,5	3	3,333333333	1,422848568	3	11,47	28,95	999	1	1
55,66	3,333333333	3	3,333333333	3	3,5	4,25	5	3,5	2,75	1	1,25	1,666666667	3,25	5	3,625	2,666666667	2,5	12,13	17,29	33	3	2
55,89	3,333333333	3,666666667	3	3,25	3	3	4,25	3,5	3,25	1	3,25	3	4	5	4,25	3,666666667	3	11,57	19,24	70	6	3
56,61	2,666666667	4,666666667	5	1,75	3,5	3,5	4,5	4	2,5	1,5	1,25	2,333333333	3	3,75	3,75	4,333333333	1,5	12,31	17,17	67	2	2
57,26	3	3	2,666666667	3,25	4,25	4,25	4,25	4,75	3,25	1	1	1	4,25	5	4	2,666666667	2,25	999	21,42	34	3	2
57,38	2,333333333	3,666666667	2,666666667	3,5	4,75	4,5	5	4,75	3,5	1	1	4,333333333	5	5	4,125	3	2,25	11,86	999	47	4	3
57,42	4,333333333	4,666666667	4,333333333	4	3,25	3,25	4,75	3,5	3	1	2,666666667	1,5	3,75	4,5	3,5	3,333333333	3,5	12,54	22,08	17	2	2
57,5	4,333333333	3,333333333	3,666666667	3,5	4,5	4,5	5	4,25	3,25	1	1	1,333333333	3	5	5	3	3,5	11,06	16,99	57	5	3
57,65	4,666666667	4,666666667	4,666666667	4	4,5	4,75	4	4,25	4,25	1,25	2	3,333333333	4,25	4,75	4,5	2,333333333	3,25	999	999	999	6	3
57,74	2,333333333	2	2,666666667	2,25	2,75	2	4,25	3,75	2,5	1,25	1,5	2	3,5	3,5	2,5	1	2,25	11,18	22,52	59	1	1
57,76	3	3,333333333	4	3	2,75	3,25	4	2,75	3,25	3,25	2,75	3,666666667	3,5	3,25	3	1,666666667	1,5	11,81	24,96	34	1	1
57,82	3,333333333	4,333333333	4	2,25	4,25	4,5	5	4,25	4,333333333	1	1	1	3,75	4,25	2,5	2	1,75	11,64	25,87	51	2	2
58,72	4	4	4,333333333	3	3,75	4	5	3,25	4,5	1,5	1,25	1	3,5	3,333333333	3,25	2,333333333	2,25	12,33	16,73	65	2	2
58,94	3,666666667	3	3,333333333	4	4,75	4,5	3,75	4,75	3,5	1	1	1,666666667	4	4,5	3	3	2,75	11,79	18,74	36	4	2
59,1	2,666666667	3,333333333	2,666666667	2,75	3	3,25	2,25	2,75	3	1	1,75	1,666666667	2,75	4,5	2,5	2,666666667	1,5	11,71	999	60	1	1
59,11	3,333333333	3,666666667	4	2	2,75	3,75	4,5	2,25	4	1	1,25	2	3,5	3,75	3,875	1	2,75	12,69	999	72	3	2
59,2	2,333333333	2,666666667	3,333333333	2,5	3	4,25	3,75	2,75	2,5	1,25	2	1,666666667	2,75	3,666666667	2,875	1	2,75	11,32	999	41	1	1
59,22	3	4	4,666666667	3	4	3,5	5	4,75	3,5	1	1	2,333333333	4,25	5	4,5	2	3,25	11,46	25,72	69	4	2
59,71	3	3,333333333	2,666666667	2	3	4,75	5	2,75	5	1	1	1,666666667	2	4,5	3,5	1	1,75	11,73	20,63	56	3	2
59,91	3,333333333	4	3,5	3,75	3,75	4,75	4,5	4	5	1	1	2	3	5	3,571428571	2,666666667	1,75	11,69	22,83	66	4	2
59,94	4,333333333	5	4	3,5	4,25	4,75	5	4,75	5	1	1	1	4	5	4,75	3	5	11,67	18,08	66	5	3
60,16	2,333333333	3	1,666666667	3,75	2,5	4,25	3,25	2,75	3	1,25	1,75	3,666666667	5	5	2,75	2,333333333	2	11,6	19,23	999	3	1
60,4	1	1	1	1,25	1,25	1,75	2,5	1,5	2,25	2,75	4,333333333	2,5	2,333333333	2	2,875	1,333333333	2,75	11,2	20,18	59	1	1
60,74	2	4	3	1,5	3,75	5	4,5	4,25	4,5	1	1	3	3,25	2,75	2,375	2,333333333	2,5	11,42	26,98	999	3	2
61,17	3,333333333	3,666666667	3,666666667	1,75	4,25	3	5	5	2	1	1	2,333333333	5	5	4,75	4	3,5	11,22	999	70	4	2
61,83	1,666666667	2	3,333333333	2	2,75	3,75	3,75	4,25	2,75	1,25	2,5	1	3,5	3	2,875	2,666666667	3	11,38	15,96	89	1	1
61,88	3,666666667	4,333333333	4,333333333	3,25	3,75	4	4	4	3,25	1	1	1,666666667	3	4,25	3,375	3	3,25	11,44	999	26	2	2
61,9	3,666666667	3,666666667	3,333333333	1,75	2,5	3,5	4,25	3,25	4,25	1	2	3	4,25	4,5	3,125	3,333333333	2,5	999	999	999	3	1
62,34	4	4,5	4	4	3,333333333	4	4,75	4	4,25	1,5	1	1,333333333	3,5	4,25	2,25	1,666666667	3,25	999	999	999	2	2
62,78	2,666666667	2,333333333	2,666666667	2	1,75	2,5	2	1,75	2	3	3,25	1,666666667	2,25	2	2,25	1,333333333	1,5	11,98	23,92	46	1	1
62,8	1,666666667	1	3	1,25	3	4	5	4	4,75	1	1	3	5	5	4,25	4	3	11,45	24,78	45	3	2
63,1	4	3,666666667	4	3,5	2	4	3,25	2,5	2,25	1	1,5	3	3,5	3,666666667	3,375	2	1	999	999	38	1	1
64,11	3,333333333	3,666666667	4	3,75	4,5	4	4,75	4,75	2,75	2	2,5	3,333333333	2,75	3,75	4,125	2	2	13,13	18,18	999	2	2
64,33	4	3,666666667	3,666666667	3,5	2,25	2,75	4,5	3	3	2	2,75	3	2,75	3,25	3,375	1,333333333	1,75	11,44	999	47	1	1
64,43	3,666666667	2,666666667	3,333333333	3	2,75	4,75	4,75	3,25	3,75	1	1,5	2,333333333	3,5	5	4,5	3	3,5	999	999	70	3	2
64,51	3,333333333	4	4,333333333	4	4,75	4,75	5	4,75	5	1	1,25	1	4,5	5	4,625	3,333333333	3,5	11,39	17,8	74	5	3
64,63	3,333333333	2,666666667	4	3	3,25	3,5	4,75	3,25	2,5	1	1,25	2,666666667	4,25	4,5	3,625	3,333333333	2,5	12,67	999	66	2	2
64,7	2,333333333	2,333333333	2,333333333	2	2,25	2,5	5	1,75	3	2,25	2,25	2,666666667	3,25	2,25	2,375	1,333333333	1,75	11,35	27,98	41	1	1
64,72	2	3,333333333	2,333333333	1,75	3,25	4,5	4,666666667	4,25	3,5	1,25	1,25	3	3,5	4	3,375	2,666666667	1,75	10,89	27,07	47	3	1
64,76	3,666666667	3,666666667	2,333333333	4	4	4	5	2	5	1,25	4	5	4,5	4	4,5	2,666666667	4	11,44	999	17	6	3
65,15	2	2,666666667	2,666666667	2,25	3	3	4,25	3,25	2,75	2,5	2	2	4	3,25	3	1,666666667	2,75	999	999	27	1	1
65,36	2	2,5	4	3	3	3,75	4,75	3	3	1	2,25	1,666666667	2,75	3	3,333333333	1	2,5	12,06	24,67	47	1	1
65,39	3,666666667	4,333333333	4	2,75	2,75	3	4,75	3	2	1	1,5	3,333333333	3,5	3,25	2,875	3,333333333	2,75	11,69	18,73	66	2	2
65,63	5	5	4,666666667	3,75	4,75	3,75	4	5	3,25	1	1,75	4,5	5	5	4,625	3,5	5	12,1	19,18	999	6	3
65,78	3	3,666666667	3	3,25	3,25	3	5	5	5	1	1	1	2	4,333333333	4	3,333333333	3,75	11,38	18,46	999	4	2
65,82	3,333333333	3	3	3,25	2,5	3,75	4	3,25	1,75	1,75	2	1,333333333	2,5	3,25	2,75	1,666666667	2,5	12,08	999	72	1	1
66,02	4,333333333	5	4,666666667	3,5	5	4,25	5	5	4,25	1	1	1	4	5	4,5	4	3	11,39	999	70	5	3
66,06	3,666666667	3,666666667	4,666666667	3,5	4,5	3,75	3,25	5	3	1,75	1	3	4,25	4	2,875	1,666666667	2,5	11,52	21,93	47	2	2
66,26	1,666666667	1,333333333	2,333333333	1,75	4,5	3	2,25	3	2,25	1,5	1	1	2	3,5	2,75	1,666666667	2	999	14,02	59	1	1
66,29	3	3,666666667	3	3	3	3	4	2,75	3,5	1,25	1	2,333333333	3	3,5	3,375	3	2,5	11,85	20,28	45	1	1
66,34	4	3,666666667	3,666666667	3	2,5	3,75	4,25	3	3,25	1,25	2	2,333333333	2,75	3,25	3,5	1,666666667	2,25	11,13	22,24	68	1	1
67,09	4	4	4,333333333	3,25	3,5	3	4	3,75	3,5	2,25	1,5	3	3,75	4,75	3,5	3	1,5	11,6	15,92	999	2	2
67,15	4,666666667	5	5	4,25	4,5	5	5	4,5	4,5	1	1	1	3,25	5	4,875	3,666666667	3,5	11,16	999	47	5	3
67,26	4,333333333	3,666666667	4	3,75	4,5	3,75	4	4	3,25	1	1	2	3,75	4,5	4,375	3,666666667	2,25	11,86	15,51	999	5	3
67,27	4,333333333	4,333333333	3,333333333	3	3,5	3	4	3,25	2,25	1	1,25	1	3,25	3,75	2,75	2,333333333	2	12,18	18,28	47	2	1
67,29	3,333333333	3,333333333	3	3,5	5	4,333333333	5	5	4,5	1	1	3,333333333	4,5	5	4,75	3,333333333	4	11,49	23,41	41	4	3
67,84	3,333333333	2,666666667	2,666666667	3	3,75	3,25	4,75	4	3,25	1	1,5	1	2,5	4,5	3,75	2,666666667	3,25	11,04	16	26	3	2
68,43	3	4	3,333333333	3	3,25	3,5	4,75	3,25	3,25	1	1,25	1,666666667	3,25	3,75	2,625	2,333333333	3	11,9	17,75	46	3	2
68,48	2,666666667	3,666666667	3	3	4	4,75	4,25	4,25	4,75	1	1,25	1	4,5	5	4,375	4	3,5	999	999	999	4	2
68,55	3,333333333	3,666666667	3,333333333	3,25	3,5	4	5	3,75	4,5	1	1,5	2,333333333	4,25	5	4,125	1	3,75	11,44	999	89	2	2
68,6	3,333333333	4	3,333333333	3	4,5	4	5	5	5	1	1	1	2,5	5	3,75	2,333333333	3,25	10,9	15,84	72	4	2
68,69	4,333333333	4,333333333	4	3,75	4	5	3,5	3,5	2,75	1,75	2	2	3	4	2,75	3,333333333	1,75	999	14,89	33	2	1
69,09	3,333333333	4,666666667	4,666666667	3	3,75	5	5	4,25	3,25	1	1	1	2,333333333	5	3,875	3,333333333	2,75	11,35	18,42	43	5	2
69,13	4,666666667	4,333333333	4	4,75	4,5	5	5	4,75	5	1	1	1	3,25	5	5	3,666666667	2,75	11,65	21,57	52	5	3
69,19	2,666666667	3,666666667	2,333333333	1,75	2	2,25	4	3	3,25	2,5	2,5	3,666666667	4	3,5	3,375	2,333333333	2,25	999	999	999	1	1
69,22	4,333333333	4,333333333	5	2,75	3,5	5	4,25	3,5	3,75	1	1,25	2	4,5	4,75	2,625	2	1,75	12,21	18,14	69	2	2
69,36	2	2,666666667	3,666666667	2,75	3	2,75	3,25	3,25	2,75	2,5	1,5	1	3	3,5	2,875	2,666666667	2,5	999	16,06	69	1	1
69,36	1	1	1	2,5	2	4	3,5	3,5	1,5	4,333333333	1	1,666666667	2,25	1,25	2,333333333	1	1,5	13,02	19,33	17	1	1
69,38	4	4,666666667	4,333333333	4	4,5	4	4,25	4,75	2,666666667	1	1,25	2,666666667	4	5	4,375	2,666666667	2,25	11,41	19,11	33	5	3
69,6	3	4	3	3	4,25	3,75	5	4,25	2,25	1,5	1	1,666666667	3	4,75	3,125	2,666666667	2	11,44	999	26	2	2
69,65	4,666666667	4,666666667	5	4	3	3	3,75	3	2,5	1,5	1,25	1,333333333	4	3,75	2,875	1,666666667	3,75	11,79	21,76	41	2	2
69,69	3,333333333	3,666666667	4	4	3,25	5	3,25	3,25	4,5	1	1	1	2,75	4,75	2,375	2,333333333	2,25	11,67	24,41	61	2	2
69,85	3,333333333	3	3,333333333	3,75	3	4	3,5	2,75	2,75	2	1,75	1,333333333	3	3,5	2	1	2	10,81	21,47	32	1	1
69,87	4,333333333	5	5	3,75	3,5	3,25	3,5	3,25	3,75	1	1	1	3	4,25	3,25	4	4,5	13,53	16,19	33	2	2
69,93	3,666666667	4	3,333333333	4,25	4	3,25	4,75	4,25	3	1	1	2,333333333	4,666666667	4,5	4	3	2,75	11,9	16,28	55	4	2
69,96	4	3,333333333	3,333333333	3,75	3,5	4,5	4	3	2,333333333	1	2	1,666666667	3,666666667	4,25	3	3,333333333	1,5	11,41	22,81	55	2	1
69,99	1	1	2,666666667	1,25	2,5	2,25	4,75	3,75	1,75	1,25	1	1,333333333	4,25	4	3,5	1	1,25	12,69	15,68	26	3	1
70,14	4,666666667	3,666666667	4	4	3	3,5	4,5	3	3,25	1,25	1,75	1,333333333	3,25	4,25	2,875	2,333333333	2	11,95	17,44	41	2	2
70,17	3,666666667	4,333333333	4,333333333	3	3,5	3	3,5	4	2,5	1	1	1,333333333	3	4,25	3	2,666666667	3,5	11,5	14,78	48	2	2
70,17	3,666666667	4,666666667	4	3,5	4,5	4	4,75	4,5	3,75	1	2	1	3,25	4,666666667	4,375	4	4,75	11,2	15,39	33	5	3
70,21	2	4	2,666666667	3,5	4,75	4,25	5	5	3,25	1	1,5	1,666666667	3,5	5	4,5	3,333333333	2,75	11,24	17,15	66	4	2
70,35	2	3	3,333333333	2	2,5	3,5	5	4,75	5	1,75	2,75	3	4	4,75	2,125	2	1,75	11,55	22,06	64	3	1
70,37	4,333333333	5	5	3,5	3,75	4,5	3,5	3,25	2,75	1,25	1,25	1,666666667	2,25	3,75	2,375	1,666666667	2,25	11,52	21,18	999	2	2
70,66	2,666666667	5	5	2,5	4	5	4,75	4,25	3,75	1	1,25	2	4	4,25	3	1,666666667	1,75	999	999	999	2	2
70,81	3,666666667	3,666666667	2,666666667	3,5	3,25	4	4,25	3,5	4,25	1,25	2	3,333333333	3,75	4,75	3	2,666666667	2	12,53	999	55	3	2
71,06	4,333333333	3,666666667	4,666666667	3,75	3,333333333	4,5	5	3,5	5	1	1	1	3,75	5	3,625	2	2,333333333	11,82	18,29	60	2	2
71,2	2,333333333	2,666666667	2,666666667	1,25	3	2,75	5	3,25	3,5	1	2	1,333333333	3	3,5	3,25	1	2,25	12,76	16,84	52	1	1
71,24	3,333333333	3,666666667	3,666666667	2,75	3,5	4	4,75	3,75	3,75	1,5	1,5	1	3	4,25	4	2,666666667	3,25	11,04	999	70	2	2
71,48	4,333333333	3,666666667	3,333333333	2,75	2,75	3	4,5	2,25	3	2	1,75	1	2,75	3,75	2,375	2,333333333	2	12,12	999	53	1	1
71,52	4	4	4	3,5	2	4,5	4,5	2,75	2,75	1	1	1,333333333	3,75	4,25	3	3	4,5	11,44	999	17	2	2
71,54	3,333333333	4	4,666666667	3,5	4,75	4,75	4,75	4	3,25	1,75	1,75	1,333333333	3,5	4,5	3,75	3,333333333	4,5	999	999	999	5	3
71,71	3,333333333	4	3,666666667	3	3	3,25	4,75	3	2,25	2,25	1,666666667	1	2	3,25	3	2,333333333	2	11,79	14,94	48	1	1
71,72	3,666666667	4	4,666666667	3	4,25	5	4,25	4,5	3,5	1	1	1	4,5	4,75	2,875	2,333333333	2,5	11,86	16,76	45	2	2
71,94	3,666666667	4,666666667	4,333333333	3,5	4,25	4,75	3,5	3	3,25	1,5	3	1,666666667	3	4	2,875	1	2,5	11,38	19,33	999	2	1
71,94	2,666666667	3,666666667	3	3	3	4	3	3,5	4,25	1,5	3,75	1,666666667	3	4,5	2,875	1,666666667	2,25	11,56	24,73	55	1	1
71,98	5	5	4,666666667	2,5	4,75	4	3,75	4,75	3,5	1	4	3,666666667	5	5	3,875	3,666666667	3	11,51	999	27	6	3
72,01	3,666666667	3	4,333333333	3,5	4,5	5	4,75	3,25	4,5	1	1	1	3,25	4	3,333333333	3	2,5	12,87	20,25	999	2	2
72,19	1,333333333	4,333333333	3,666666667	3	4,75	4,5	4,75	5	2,75	1,25	3,25	4,333333333	4,25	4,75	3,125	3	3,25	11,74	17,78	51	6	3
72,49	2	2,333333333	2	1,75	3,5	4	4,5	2,333333333	2	1,75	1	1,333333333	3,25	3,5	2,375	3	2,25	999	999	999	1	1
72,78	3,333333333	3,333333333	3,666666667	4	4	4,5	3,25	4	2,5	1,75	1,75	2,333333333	4	4	4,125	3,333333333	4	11,72	18,17	36	6	3
72,81	3	4	3	3,5	2,75	4	5	3,75	2	1,5	1,25	1,666666667	3	4,25	3,5	3,666666667	1,75	11,44	999	26	2	2
72,88	3	4	3,666666667	4,25	2,5	4	3,75	3	3,25	1	1	1,666666667	3,5	4,5	2,875	2,333333333	3	11,29	20,58	68	2	2
73,14	4	4,666666667	3,666666667	3,75	4	4,75	5	4,25	4,75	1	1,5	2	4,25	4,25	3,5	2	3,25	11,4	23,34	46	5	3
73,35	4,666666667	4,333333333	4,666666667	3,5	4,25	4,75	5	4,25	3,75	1	1	1,666666667	2,75	5	4,25	3,333333333	3,5	11,63	14,37	59	5	3
73,53	3	3	3,666666667	2,75	2,5	2,5	4,75	4,75	4,75	1	1,5	2,666666667	4,25	4,75	3,75	2,333333333	2	11,59	16,27	51	3	2
73,57	3	3,333333333	3,333333333	2,75	3,666666667	4,5	5	4,25	5	1	1	1	3,75	4,5	4,25	1,666666667	3,5	11,16	18,65	47	4	2
73,85	3,333333333	3,5	3,5	5	5	5	5	4,75	2,75	1	1,75	1,666666667	2,75	4,75	4,5	2	3	10,96	999	48	5	3
73,87	3,333333333	3,666666667	4,333333333	2,75	3,5	3,75	4,5	3,75	3,75	1	1,25	1,333333333	4,5	4,75	4,25	3,333333333	3,25	11,11	16,6	47	4	2
73,94	3	2,666666667	2,666666667	2	2,25	2,75	3,75	3	2,25	1	1,75	4,666666667	5	4	2,875	1,333333333	2,75	11,13	20,51	60	1	1
74,12	2,333333333	2,333333333	4	2,75	2,25	4	3,25	2,75	3,25	1	1,75	4,333333333	4,25	4,5	3,25	2,333333333	2,75	11,44	999	27	3	1
74,13	4	4,666666667	4,333333333	3	3,75	3,75	4,5	4,5	4,75	1,25	1,25	2	3,25	4,5	3	2,666666667	2,5	11,38	22,53	43	2	2
74,23	3,333333333	3,666666667	4	2,75	4,75	4,5	5	4,75	4,25	1	1,25	2,666666667	4,5	5	4,75	3	2,75	999	999	999	4	3
74,47	4	5	4,333333333	2,75	3,5	4,5	4,5	3,75	4,5	1	2	3,666666667	4,75	5	4,75	3,333333333	3,25	11,43	22,08	46	6	3
74,94	3,666666667	4,333333333	4,333333333	3	1,75	3	2,75	1,25	3,5	3,5	4,75	2,333333333	2	1	2	2	2,25	12,5	22,06	39	1	1
74,99	4	3,666666667	4,666666667	3,75	3,75	4,5	4,25	3,5	4,5	1,5	1,75	1,333333333	2,5	3,25	2,5	2	2	999	17,18	999	2	2
75,11	3	3	3,333333333	2,5	2,75	3	3	2,75	2,25	1	1	1	2,333333333	2,5	2	1,333333333	2,5	11,4	16,58	66	1	1
75,12026196	2	2,666666667	3	1,25	2	2,5	1,5	1,5	1	2,75	1	1	1,25	1,75	1,125	1	1	11,35	15,03	999	1	1
75,37	3	4,666666667	4	3	4	3	5	5	3,25	1	1	1	3	5	3,375	1,333333333	2	11,82	19,04	70	2	2
75,38	3,666666667	3,666666667	3,333333333	3,75	3,5	4	5	4,25	4,5	1	1	2,333333333	4,5	5	4,5	2,333333333	2,25	10,97	999	72	4	2
75,5	4,666666667	4,333333333	4	4,25	4,25	4,75	4,25	4,5	4	1	1	2	4,75	5	4,875	1	2,75	11,84	20,81	62	5	3
75,56	4,333333333	5	3,333333333	3,5	1,5	4	3,75	2,5	4	2	5	2,333333333	2,75	2,75	3,625	2,666666667	3	12,38	23,87	70	1	1
75,63	4,666666667	4	3,666666667	4,5	3,75	5	5	4	3,75	1	1	1	4,5	4,5	4,25	3,666666667	2,75	12,38	19,17	42	5	3
75,72	4	3,666666667	3,333333333	4	3,75	4,75	4,25	3,5	4,5	1	1	2	4,25	4	3,125	2,333333333	2,5	999	16,75	17	4	2
76,02	4,333333333	4,666666667	4,333333333	3,75	4,75	4,75	4,75	5	4,25	1	1	1	4	4,75	4,375	4	4	11,52	15,27	33	5	3
76,09	5	5	5	4	4,25	5	4,25	4,75	4,75	1	2	3,333333333	4,5	4,75	4	4	4,25	999	999	999	6	3
76,64	2,666666667	3,666666667	3,333333333	2,5	3,25	2	5	3,25	3,5	1,5	1,5	2	3	3,5	3,125	3	2,25	11,01	24,52	59	1	1
76,78	1,333333333	3,333333333	3	1,75	2,75	5	3,5	2,5	4	1	1,5	4	3,5	3,25	3,375	2	1	11,5	23,9	25	3	1
76,86	3,333333333	3,666666667	3,666666667	2	4,75	5	4,5	4,5	4	1,25	2,75	2,333333333	4,25	5	4,25	3,333333333	3,333333333	12	16,69	72	4	3
76,88	2	2,666666667	2,5	2,25	2	5	2,75	1	5	1,25	2,75	1	2	1,75	3,125	2,333333333	2,5	12,13	999	89	1	1
76,99	4,333333333	3,333333333	3,666666667	3,75	2,5	4	4,5	2,75	2,75	1	1	1	2,75	5	3,25	2,333333333	3	11,35	16,52	63	2	2
77,31	3	4	3,666666667	3,25	3,75	3,75	5	4,25	5	1	1,5	1,333333333	3,75	4,75	4	3	2,25	999	999	999	4	2
77,74	4	3,666666667	3,666666667	3,75	4	4,5	4,25	4,333333333	4,25	1	1	1,333333333	3,75	5	4,125	2	1	11,72	16,84	41	4	2
78,02	4,666666667	4	4,666666667	3,25	3	3,25	4,75	3	3,25	1	1,5	2,333333333	4	4,5	3,25	2,666666667	3,5	11,8	18,08	999	2	2
78,09491541	3,333333333	3,333333333	3,666666667	3	1,5	3,25	2,5	1,75	2,25	2,25	4,5	3,666666667	2	3	3,125	2	1,75	11,92	30,55	32	1	1
78,1	3,333333333	3,666666667	4	3	4	4,25	4,25	3,75	2,25	1	1	1,333333333	2,5	4,5	3	2	2,5	999	22,75	41	2	2
78,1	4	4,333333333	4,666666667	3	3	3,25	4,75	3,25	3,5	1,25	1	1,333333333	2,75	4,25	2,875	1,666666667	1,5	11,17	14,8	41	2	2
78,11	1,666666667	3,333333333	2,333333333	2	3	4,5	3,25	2,75	2,5	1	1,5	2,333333333	3	3	2,25	2,333333333	1,75	999	999	999	1	1
78,14	3,333333333	4,333333333	4	2,75	3	3,75	5	3,5	2,5	1,25	1,75	2	4	4,75	3,5	3,333333333	2,75	11,73	17,75	70	2	2
78,14	2,333333333	2	2	5	4,5	4,5	5	4,5	5	1,5	1	3	4,25	4,75	4,5	2,666666667	4	11,42	18,38	999	4	2
78,16	3	3,333333333	4,333333333	2,75	3,25	4,5	4,75	3,25	4,5	1	1,25	2,333333333	4	4,5	4,25	3	3,25	12,02	17,49	68	4	2
78,43	2,666666667	3,666666667	2,666666667	2,25	3,25	4,75	5	3	4,75	1,25	1,75	3,333333333	4,25	3,5	3,5	1,333333333	1,75	11,44	999	47	3	2
78,59	3	2,666666667	3,666666667	3,25	4,25	4	3,75	4	3,25	1,5	1	1,333333333	3,75	4,75	3,25	1	3	11,44	17,6	49	3	2
78,61	4,333333333	3,333333333	3,333333333	3,5	3,25	3,5	4,25	3,25	2,75	1,5	2	2,333333333	3,5	3	3,625	3	3,75	11,4	19,98	47	2	2
78,69	4,333333333	4	4,333333333	3,5	4,25	5	5	4,25	4,5	1	1	2,333333333	4	5	4,5	4	4,5	11,38	31,27	40	5	3
78,72	4,333333333	4,666666667	4,333333333	4,75	4	4,5	5	4,25	1,25	1	1	1,666666667	4	5	4,75	4,333333333	4,25	12,13	25,8	38	5	3
78,79	3,666666667	3,666666667	3,333333333	3	3	3	3,5	3,5	3,25	1	1,75	1,666666667	3	4,5	2,875	2,333333333	2,25	999	19,02	69	1	1
79,07	2,333333333	3	3	1,75	3,25	3,75	4	3,75	3	2,25	1,25	1	3,25	4,5	3,875	1,666666667	1,75	11,68	17,35	89	3	1
79,1	3	3	3	3	2,5	3	4,5	2,5	3	1	2,5	2,666666667	3,5	4,25	2,5	2,666666667	1,75	11,51	22,92	29	1	1
79,17	4,666666667	5	5	4,75	3,5	4,75	4,75	3,25	4	1	1	1,333333333	4	5	4,875	4,666666667	3	10,89	16,42	71	5	3
79,2	4,666666667	5	4,333333333	4,25	3,5	5	5	3,25	3	1	1,25	1	3,5	4,25	3,5	3,333333333	4,25	12,42	16,68	60	5	3
79,35	3,666666667	4,666666667	4	3,666666667	3,75	4,25	5	4,5	4,5	1	1	1	4	5	4,5	3,333333333	3,25	11,43	19,8	59	5	3
79,35	4,666666667	4,333333333	5	4,5	4,5	4,75	5	4,25	2	1	1,5	3,333333333	5	4,5	3,875	2,666666667	3,5	11,44	999	36	6	3
79,64	4	5	4,666666667	4,75	4,75	5	5	4,75	5	1	1,75	2,333333333	4,75	5	4,375	2,333333333	3	11,51	19,95	57	6	3
79,71	2,666666667	5	4,666666667	3,25	4,25	5	5	5	5	1	1	1	4,5	5	4,875	2,666666667	3,5	12,1	19,82	41	5	3
80,09	3,666666667	4,333333333	3,666666667	3,5	4,75	4	5	5	4,25	1	2,25	3,666666667	5	5	4,625	1,333333333	2,5	11,5	14,85	40	6	3
80,13	2,333333333	3,333333333	3,333333333	3,5	4,5	3,75	4,5	4,25	3,5	1,25	1,25	2,666666667	4	4,75	4,125	3,333333333	2,666666667	11,91	18,32	53	4	2
80,26	4,333333333	4,666666667	5	3,333333333	4,333333333	5	5	5	4,333333333	1	1	3,5	5	4	4,25	2,333333333	4	11,62	21,04	43	6	3
80,53	3,333333333	3,333333333	2,666666667	3	4,25	4,5	4,75	4,5	3,5	2	1	2	5	5	4,375	2,666666667	3	999	999	999	4	2
80,61	3	3,333333333	3,666666667	2,25	1,75	3,25	2,25	1,75	1,75	1,25	2,25	3,333333333	2,5	3,5	3	2,666666667	2	12,24	29,74	33	1	1
80,61	3,333333333	2,666666667	2	3	3,5	3	2,5	2,5	3	1,25	2,25	4	3,25	4,5	2,375	2	2,75	11,72	18,91	32	1	1
80,66	3,666666667	4,666666667	3,666666667	3	4,5	4,75	5	4,5	5	1,5	1	1	2,25	5	4,25	3,333333333	2,75	11,73	999	72	5	3
80,88	2,666666667	1,5	1,333333333	2,75	4,5	5	5	4	2	1	1	1	3,5	4,5	4,714285714	1,666666667	3	999	16,66	26	3	2
80,92	2	3,333333333	3,333333333	1,5	3	4,5	5	3,25	3,75	1	1,25	1,333333333	3,5	4,25	4,142857143	2,666666667	3,25	11,82	16,66	66	3	2
81,03	3	3	3	2,666666667	3	2	4,5	3,5	2	1	1,75	2,666666667	4	3,75	3	2,666666667	3	11,88	999	74	1	1
81,21	3	3,333333333	3,666666667	3	3,5	4	5	4,5	4,25	1	1,25	1,666666667	4,25	4,25	3,625	3	3,333333333	11,92	21,27	48	4	2
81,24	3	3,666666667	4,666666667	3	4	3,75	4	3,5	3,25	1	1,25	1,666666667	3,5	5	3,75	3	2,25	999	25,2	33	2	2
81,28	1,666666667	3	2,666666667	3,5	5	5	5	4,75	3,75	1	1	1	3	4,75	3,625	3,666666667	2	11,44	18,96	25	4	2
81,74	1,333333333	2,333333333	2	1,5	3	4	4,5	3,5	4,5	1	2	3	4,25	4,5	3,375	2,666666667	2,75	999	999	999	3	1
81,75	2,333333333	3,333333333	3	2	3,333333333	4,25	2,25	2,25	2	1,5	1	1	2,75	4	2,5	1,666666667	1,25	11,14	19,22	35	1	1
81,87	3,666666667	3	3	3,25	2,25	3,5	3,5	2,25	3	1,25	2,75	1,666666667	1,75	2,5	2,125	2,333333333	2	11,62	18,4	59	1	1
82,02	3,333333333	4,666666667	3,333333333	3,5	4,25	4,75	5	4,75	4,25	1	1,5	1,666666667	4	5	3,75	2,333333333	2,5	11,51	25,21	37	4	2
82,14	3	3	3	3,25	3,25	3	3,75	3,75	2,75	1	1	1	2,5	3,75	2,375	1,666666667	2,25	12,38	22,98	70	1	1
82,53	4	4,333333333	4,666666667	4	4,25	5	5	4	4,25	1	1	1,333333333	3,75	5	4,75	3	1,75	9,93	18,03	41	5	3
82,6	4	4,333333333	4,666666667	3,25	3,666666667	4	5	4,75	5	1,5	1,75	1,666666667	2,25	5	3,875	1	2,333333333	11,38	16,15	29	2	2
82,62	4,666666667	5	4,666666667	4,25	2,75	4	4,75	3,25	3,25	1	1	1,333333333	2,5	3,75	3,75	2,5	2,75	11,26	999	47	2	2
82,93	4,666666667	4,666666667	4,666666667	4	4,75	5	5	4,5	4,75	1	1	1	5	5	4,5	3	4	11,58	16,73	41	5	3
82,93	2,666666667	4,666666667	4,333333333	3,25	3,5	4,5	4,75	3,333333333	3,25	1	1	2	3,75	5	3,625	3	2,75	11,66	19,44	37	2	2
82,97	3,333333333	4	4	4	3	4,75	5	3,25	3,75	1	1,75	2,333333333	3,75	4	3,375	3,666666667	2	11,92	999	31	2	2
83,09	1	1	1	4,5	5	5	5	5	5	1	1	1	4,5	5	5	5	3,75	11,01	22,64	47	4	2
83,45	4	3,666666667	3	3,75	3,5	4,5	4,25	3,25	1,75	1	1	1,666666667	3,75	4,75	4,194666717	2	2,25	11,61	17,09	56	2	2
83,5	2,333333333	1,666666667	3	2,5	3	2,25	3,5	4	2,75	1,25	2,5	2,333333333	4	4,25	3,75	4,333333333	2,333333333	11,51	24,54	999	3	1
83,5	2	2,333333333	2	3	2,75	3,25	3,75	3,5	4,5	1,75	2	2,333333333	4,25	4,75	3,625	2,333333333	3,75	11,27	19,31	61	3	1
84,02	3,333333333	4,333333333	4,666666667	3,5	4	5	5	3,5	5	1	1	2	4,5	5	4,125	3	1,5	11	18,24	37	4	2
84,04	4,666666667	4	3,333333333	3	3,75	3,75	4,75	4,25	2,75	1	1,25	2,333333333	4,25	3,75	3,125	1	3,5	11,41	18,81	29	2	2
84,04	3,333333333	4	4	3	3,5	2,25	3,75	4,25	3,25	1	1,75	2	3,5	3,25	3,75	3	2	11,28	15,83	65	2	2
84,41	3,666666667	4,666666667	4,333333333	3	5	4,666666667	5	4,25	5	1	2,25	2,666666667	4,25	4,666666667	4	2,666666667	4,5	11,9	19,97	53	6	3
84,49	3,333333333	4,333333333	4,333333333	3,25	5	4,5	3,5	4,25	4,25	1,25	1,25	2	4,25	4,25	3,375	2,333333333	3,75	11,44	999	69	5	3
84,93	2	3,333333333	2,333333333	2,75	3,5	4	3,5	3,333333333	4	1,25	2	4	4	4,25	4	2,666666667	3	11,44	23,9	41	3	1
85	4,666666667	4	4	4,75	4,666666667	5	4,75	5	4,5	1,25	1,5	2,666666667	4,25	5	4,5	4	4,25	999	24,42	999	5	3
85,12119193	3,666666667	2,666666667	4	3	3	4,5	4,25	3	2,75	2	1,5	1,333333333	2	3,5	2,75	1,666666667	2	999	999	999	1	1
85,20976986	3,666666667	3,333333333	2,666666667	2,25	2,75	3,5	3,75	3,25	2	1	3	2,666666667	2,25	3,5	1,875	1	1,5	11,19	22,34	17	1	1
85,22	3,333333333	2,333333333	3	3,5	3	3,5	5	4	1,75	1	1,75	2	5	5	3,75	3,666666667	2,5	11,51	21,5	46	3	2
85,8	2,666666667	2,666666667	2,333333333	3,75	4,5	4,5	4	4	4,5	1	1,25	1,666666667	4,5	5	3,875	2	1,75	11,87	17,91	71	3	2
85,87	1,666666667	2	3	1	2,25	4,5	3,5	3	2,75	2	2,75	2,333333333	3,75	2,75	3,625	2,333333333	2,75	12,52	23,09	42	1	1
86,27	4,666666667	4,666666667	4	4,25	4,25	2,5	3,5	4	1,5	1,75	1,75	2	3,5	4,75	3,375	2	3,25	11,23	16,51	70	2	2
86,66	4,333333333	4,666666667	4	3,5	3,75	4	4	3	4,5	1,75	4	3,666666667	3	3,5	3,75	3,333333333	3,5	11,01	21,95	26	6	3
86,73	3	5	4,666666667	3,75	5	5	5	5	4,5	1	1,5	2,333333333	4,75	3,5	4,375	2,666666667	4	11,39	18,34	74	6	3
87,03	4,666666667	4,666666667	5	5	4,25	5	5	5	4	2,75	4,5	2,666666667	1,5	3,75	2,25	2,666666667	2	11,62	25,91	33	2	2
87,18	5	5	5	4,5	4,75	5	5	5	4,5	1	1	2	4	5	4,25	3	3,75	11,17	15,91	66	5	3
87,19	4	3,333333333	4	4,25	3,5	2,5	5	3,5	2,75	1	1	1	2	3,5	3,875	2,333333333	2,25	11,92	17,43	45	2	2
87,44	3	3	4	2	3	4,5	5	3,75	4	1	1,25	2	3,75	4,5	3,25	1,666666667	3,75	11,46	26,57	49	3	2
87,48	3,333333333	4	3,676751414	2,5	4,333333333	4,5	4,75	4,666666667	4	1	1,75	2	4,5	4,5	4	4	3,5	11,32	17,39	999	4	3
87,91	4,666666667	3,666666667	4,666666667	3,5	3,75	4,75	5	4,25	4	1,5	2,5	3,333333333	4,333333333	4,75	3,571428571	3,666666667	3,25	11,72	17,74	48	6	3
88,19	3,333333333	4,666666667	4,333333333	3,75	4,5	4,5	5	5	2,25	1	1	2,333333333	4	5	4,5	1,666666667	2,5	11,71	19,03	53	5	3
88,3	4	4,666666667	4,333333333	3	3,5	4,333333333	4	3,333333333	1,75	1	2	1,333333333	2,75	3,75	3,625	3	3	11,55	16,16	70	2	2
88,55	3	4,666666667	4,333333333	3	4	4,5	5	3,5	2,75	1	1	2	4,25	5	4,375	3	4	11,72	18,66	65	4	3
88,57	3	3	3,333333333	4	4,25	4,5	5	4,5	4,75	1	1,5	2,333333333	4,5	4,75	2,875	2,666666667	3,25	999	999	999	4	2
88,69	2,666666667	2,333333333	2	2,75	2	3,25	4,25	2	2,5	1,5	3	3,666666667	2,25	2,25	2,5	1	1,75	11,44	22,17	45	1	1
88,75	3	4	4	4,25	4,75	5	4,75	4,75	5	1	2	1	4	5	4,875	2,666666667	3,75	11,07	15,57	59	5	3
88,82	1,666666667	3	2,333333333	1,75	2,5	3,5	5	3,5	1,75	1	1,75	3,666666667	2,75	2,75	3,625	1	4	12,76	24,83	59	1	1
88,82	2	2,333333333	1,666666667	3	1,75	4	4,25	2,75	2,5	1	2	3	3,75	4,25	1,875	2	4	11,23	22,49	33	1	1
88,82	2,333333333	2	2	2,5	2,75	3,5	4,25	3,25	3	1,5	1,5	3	3,25	3,75	2,714285714	1	1,75	999	999	999	1	1
88,98779247	3,666666667	3,666666667	3,333333333	3,5	4	3,5	3,5	4,25	2,75	1,5	2,5	1	2,75	4,5	3	2,666666667	2,25	10,57	15,04	67	2	1
88,99	3	4	4,333333333	3,5	4,25	4,5	5	4	3	1,5	1,333333333	1,666666667	3,75	3,25	2,625	1,666666667	2	999	999	66	2	2
89,24	3	4,666666667	4	2	2	4,5	3,5	2,5	3,333333333	1,333333333	1,5	2	3	4,333333333	2,125	1,333333333	2,5	11,23	21,38	48	1	1
89,24	3	3	3	3,25	2,75	3,25	4	3	3,25	1,5	1	1,333333333	3,25	4,25	3	2	2,5	11,07	20,3	69	1	1
89,24	3,666666667	4,333333333	4,333333333	3	2,5	4,5	4,75	2,75	4,75	1,75	1,25	1	2,5	4	3,125	2	2,5	999	999	999	2	2
89,41	2,333333333	4,333333333	4,333333333	1,25	3,75	5	5	3,666666667	4	1	1	1,333333333	3,5	4,5	3,375	3	4	12,88	23,15	54	4	2
89,56	4	4,666666667	3,666666667	2,5	3,25	2,75	5	3,25	4	1,25	1	2	3,5	5	4,125	2,666666667	3	11,21	39,98	66	2	2
89,73	4,666666667	3,666666667	4	4,25	4,25	5	5	4	4	1,25	1	1,666666667	3,75	5	4,375	2,666666667	1,75	12,89	27,25	69	5	3
89,82	4,333333333	3,333333333	4,333333333	3	3,5	4,5	5	3	3	1	1	1	3,75	5	4,75	2	3,75	11,66	19,11	47	2	2
89,89	4	4,333333333	4,333333333	4,5	4,75	4	5	4,75	3	2,25	1	1,333333333	3	5	3,25	4	4,25	11,76	14,37	89	5	3
90,36298013	2,333333333	3,666666667	4	2	3,25	4,5	3,25	3	1,5	1,25	1,75	2	1,75	2	2,625	1	3	11,51	25,42	27	1	1
90,4	4,333333333	4	4	3,666666667	4,25	5	4,75	4,25	4,75	1	1,25	1,666666667	4,75	5	4,75	3	3	11,61	19,81	27	5	3
90,62	3,666666667	3,666666667	3,333333333	3	2,25	4,75	4,25	3,25	2	1,5	1	2,333333333	3	3,25	2,875	2	2,5	11,44	999	44	1	1
91,35	1,333333333	1,666666667	1	2,25	3,5	4,25	4,25	3,5	3	2	1	1	3,5	4,75	4,125	1,333333333	2,5	11,43	19,81	41	3	1
91,39	4,333333333	4,333333333	4,333333333	3,5	4	5	4,5	4,75	4	1	1	1	5	5	4,25	3	2,75	11,3	999	49	5	3
92,4	3	2,666666667	2,666666667	3,75	2,75	2,75	4,5	2,75	3	1	3,25	3	3,25	3,75	3,125	2	1,5	12,62	27,55	999	1	1
92,42	4	4,666666667	4,666666667	3,75	4,25	5	5	3,75	5	1	1	1	5	4	4,75	4	3,5	11,44	999	999	5	3
92,42	4,333333333	4	4,333333333	4,25	3,75	4,5	5	3,5	3	1	1	2	4,75	4,25	3,571428571	3,333333333	3,75	9,15	19,04	29	5	3
92,42	3	3,333333333	2,666666667	2,5	2,5	3	4	3	1,5	1	1,5	1	2	4	4	1,333333333	2	11,36	18,03	47	1	1
92,69	2	2,5	3	2,25	3	3,75	3,5	4	2,75	1	1	1,666666667	3,75	4,75	4,375	3	3	11,11	16,56	60	3	2
92,76	3	3,666666667	3	3	3	3	5	4,25	3,75	1	1	1	2,75	5	4,25	3	2,5	11,8	17,96	999	4	2
92,81	4,5	4	2,5	2,666666667	3,5	3,666666667	4,25	3,5	2,75	1	2	2,333333333	3,25	4,25	3	2,666666667	1	11,72	16,67	74	2	1
92,81	4	4	3,666666667	3	3	4,5	4,25	3	2,75	1	2	2,333333333	3,5	3,75	3	3	3,75	10,57	14,86	55	2	2
92,81	4,666666667	4,333333333	3,666666667	4	3,5	4,5	4,75	3	4,25	1	2,25	2	3,25	4,5	3,5	2	3,75	11,23	16,37	54	2	2
93,3	2,5	4	3,666666667	3	4,333333333	4	5	4	3,5	1,5	1,25	1	3	4	3,75	2,666666667	3	11,61	19,89	66	2	2
93,3	1,666666667	2,666666667	3	1,5	3,75	3,75	4,5	3,75	2	1,75	1,25	1,333333333	3,25	4	3,5	2	2	12,09	19,31	33	3	1
93,39	4,333333333	3,333333333	3,333333333	4,75	3,5	3	5	3,25	3,5	1	2,5	1	4,25	5	3,75	1,666666667	3,5	12,86	28,02	72	2	2
93,57	3	3	3,333333333	3,25	2,75	4	3,5	2,75	3,75	1	2,25	2,666666667	3,75	4,5	3,375	2,666666667	2,75	12,76	25,79	27	1	1
93,57	4	3,333333333	3,333333333	3,25	4,25	3,25	3,5	4	2,5	1	2,25	3	4,25	3,75	3,125	2,333333333	1,75	11,82	20,95	66	1	1
93,65	4	5	4	3	3,25	2,75	4,75	4,5	1,5	1,75	4	2,333333333	2,5	2,25	3,125	1,333333333	3	12,6	18,36	67	1	1
93,69378374	3,666666667	4,333333333	4	3,25	4	5	3,75	4,5	2	1,5	1,75	2	1,75	2,666666667	2	1,333333333	1,75	11,49	18,34	27	1	1
94	3,666666667	4,666666667	3,666666667	4,25	4,333333333	4	5	4,75	4	1	3	2,666666667	4	5	3,625	2,333333333	3,25	11,93	15,47	41	6	3
94,07946185	3,666666667	4	4	4	3,75	4	5	3,75	3,5	2	1	2	3	5	2,75	2	1,5	999	20,04	47	2	2
94,1	3	2,666666667	2,666666667	2,75	4	4	5	4	2,25	1	1	1,666666667	4	4,5	4,875	1,666666667	3,25	999	999	999	3	2
94,42	3,333333333	4	4	2,75	4	4,5	4,333333333	4,25	4,25	1	1	1	2,25	5	4	3,333333333	3,5	11,29	16,37	74	5	3
94,45	2,666666667	3,5	2	2,25	2,5	3,75	4	2,333333333	3,75	1	1	1	3,5	4	3	2,333333333	1,75	11,47	17,62	46	3	1
94,45	3,333333333	4	4	3,25	3	4,25	4,25	2,75	2,75	1	1,5	1,333333333	3	4	2,125	2	2,333333333	11,57	19,71	66	1	1
94,59	3,333333333	3	2,666666667	2,75	3,5	4	4,75	3,5	4	1	1,75	2	4,25	4,75	2,714285714	1,666666667	1,5	11,44	999	999	3	2
94,61526631	3,333333333	4	3,333333333	2,333333333	3,75	4,5	3,75	3,666666667	1,25	1	1,5	1,333333333	3	5	3,25	1	2	11,61	14,92	56	1	1
94,68	2,666666667	3,666666667	4	2,5	3,75	4,25	4,25	3,5	4	1	1	1	2,75	5	3,375	2,333333333	2,75	11,63	14,24	999	2	2
94,69303507	3	3,333333333	2,666666667	3,25	3,75	4	5	3	1	2,25	1	2	2,5	3,25	2,375	1,333333333	1,25	999	18,87	27	1	1
94,70860509	2,666666667	3	3,666666667	1,75	3,25	4,5	5	3,5	2,75	1,25	1,75	1,333333333	3,5	4,75	3,875	2	1,75	12,24	20,14	54	3	2
94,83	4,333333333	5	4,666666667	4,5	4,25	4,5	5	5	4	1	2	3,333333333	4,75	5	5	4,666666667	5	11,46	15,62	47	6	3
94,89	3,333333333	3,666666667	4	2,5	3,75	4,25	4,5	4	4,25	2,25	2,5	2	3,5	3,75	3,875	3	3	11,74	17,24	52	2	2
95,04	3,666666667	3,666666667	3,666666667	3,75	3,75	4,25	4,25	4	3,5	1	1,5	3	4,25	4,75	3,5	2,333333333	4,25	10,95	18,03	40	6	3
95,06	5	4,666666667	5	4,5	5	5	5	5	5	1	2	1	4,25	5	4	4	4,5	11,67	17,84	72	5	3
95,06607941	4,666666667	3,666666667	3,666666667	3,25	3,25	4	2,5	2,5	1,75	1,5	1,5	1,5	2,25	3	1,375	1,666666667	1	11,35	999	45	1	1
95,06941523	3,666666667	3,666666667	2,666666667	3,5	3,75	3,75	3,25	3,75	2,5	1	1,75	1,333333333	3,75	4	4	3	3,25	11,75	17,73	46	2	2
95,17	3,333333333	4	5	3,25	4,5	5	4,75	5	4,75	1	1,75	1	4,5	5	4,875	4,333333333	3,75	999	999	999	5	3
95,18	1,666666667	1,333333333	2,333333333	3,25	3,5	3	4	4,5	2,75	1	1,25	1,333333333	4,5	5	4,25	2,333333333	1,5	10,96	18,39	67	3	2
95,18436111	3,333333333	3,333333333	3,666666667	3,5	3,5	3,75	5	4	2,75	1,75	1	1,666666667	4,25	4	3,75	1,666666667	3	11,26	999	46	2	2
95,34	1,333333333	3,666666667	3	2,75	4,75	4,5	4	4	4,25	1	1	1,333333333	4,666666667	4,333333333	4,125	3,666666667	1,75	999	999	999	4	2
95,42579404	3	4,666666667	4,666666667	3,75	3,25	4	4,25	3,5	3,25	1	2,25	2,333333333	4,25	4,666666667	4,5	2,333333333	2,75	10,88	999	999	2	2
95,65	4	3,333333333	4	3,5	3,75	4,75	5	4	3,5	1,25	2	1	3,25	4,75	4,75	2	3,25	999	22,14	45	5	2
95,65	4,333333333	4,666666667	4,666666667	4,5	4	3	5	4	3,75	1,25	2,333333333	1,666666667	3,75	4	3,875	2,666666667	2,5	10,64	17,08	40	5	2
95,86	3,333333333	4	3,666666667	4	3,666666667	4,25	4,75	4,25	3,75	1	2,25	4	4,75	4,75	3,5	2,666666667	2,5	11,17	14,97	57	6	3
96,13	3,666666667	2	4	3,5	4,25	4,666666667	4,5	4,25	3,5	1	1,5	1	3,75	3,25	3,428571429	3	2,25	10,19	17,58	41	4	2
96,14	4,333333333	5	5	4	4,5	5	5	4,75	5	4	2	3,666666667	4	2	4,571428571	2,333333333	2,5	10,4	26,33	66	6	3
96,43	4,333333333	3,666666667	2,666666667	2,25	3,5	3,75	4,25	3,5	3,75	1	2,333333333	2	4,5	4,75	3,875	1,666666667	2,25	999	999	999	3	2
96,43	3,666666667	3,333333333	4	2,75	3,75	4,25	4	3,5	2,5	1	2,75	3	4,75	4,75	3,5	1,666666667	3,75	11,91	17,56	72	2	2
96,48	4,666666667	5	5	4,5	4,5	5	5	5	4,25	1	1	1	4,25	5	4	3,333333333	3,5	11,68	15,77	67	5	3
96,569404	3,333333333	3,666666667	4,333333333	3,75	3,25	2,5	5	3	2,75	1	1,25	1,666666667	4	4	3,5	4	3	11,1	999	33	2	2
96,78977527	5	4,333333333	4	5	4,75	3,25	5	4,25	2,5	1,25	1,25	1	3	3,75	5	3	3	999	20,47	51	5	3
96,92	4,666666667	4,666666667	4,666666667	4	5	5	5	4,5	3,75	1	1,25	3,666666667	5	5	4,875	3	3,75	11,93	16,61	48	6	3
96,96	4	4,333333333	4	3,25	3,25	5	5	3,25	3,75	1	1,25	2,666666667	3,25	4,75	3,375	2,333333333	2,75	10,99	999	41	2	2
96,99164234	2,666666667	2,666666667	4	1,5	2,5	2,5	5	3,5	1,75	1,5	1	2	3	3	4	1,666666667	2,25	11,47	22,29	27	1	1
97,74273371	1,666666667	2,666666667	1,666666667	2,25	2,75	4,75	4,25	3	2,25	2,25	1,25	3,333333333	3,75	1,5	2,625	1,333333333	3	11,02	16,77	999	1	1
97,75525182	3,333333333	3,333333333	3,666666667	4,5	4,25	4,5	4,75	3,75	3,75	1	1,75	1	3,75	3,75	3,625	5	3,75	999	999	999	5	3
98,08	3,333333333	4,666666667	5	2,25	2,75	3,5	4,25	3,25	4,75	2,75	1,25	1,666666667	3	3,25	3,25	3,666666667	4	11,44	999	33	2	2
98,2	4,333333333	4	3,333333333	2,75	3,75	4	3,5	4,25	3,5	1,5	1,75	1,666666667	3	4,25	2,875	2,333333333	2,5	11,3	16,78	999	2	1
98,26	3,666666667	3,333333333	3,333333333	2,5	3,25	3	4,25	4,25	3,333333333	1	1,25	1,666666667	4	4,75	3,625	2	2,25	10,95	17,77	68	3	2
98,26	3,333333333	3,333333333	3,333333333	3,5	5	5	5	4	4,25	2,5	1	1,333333333	3,75	5	5	4	4	12,34	18,97	37	5	3
98,48	3	3,666666667	3	5	4	4	5	4	4	1,5	1	1	3,666666667	5	3,4	2,333333333	3,25	11,03	22,82	999	4	2
98,59	3,666666667	4	4	3	4	3,75	5	4	2,75	1,25	1	1,666666667	3,75	4,25	3,375	3	3,25	999	999	26	2	2
98,59	4	4,666666667	4	2,5	3,5	3,25	5	3,75	3	1,25	1,25	2,333333333	3	3,5	3,75	2	2,5	11,47	19,61	69	2	2
98,62	4	3	3	3,5	4,25	4,5	4,75	4,5	2	1	2	4,666666667	4,5	5	4,625	2,666666667	3,75	999	20,43	999	6	3
98,62	4	5	4,333333333	3	3,25	4,5	4,25	3,25	3,25	1,5	1,5	2,333333333	4	4,5	4,5	2	4,25	11,44	999	43	2	2
98,77	3,666666667	4,666666667	3,666666667	3,5	4	4,25	4,75	3,5	3,25	1,25	1,5	2,333333333	3,5	3,75	3,5	2	3,25	999	999	999	2	2
98,77	3	3,333333333	3	3,5	3	3,75	5	3,75	3,25	1,25	1,75	3	3,75	4	3,857142857	1	1	11,27	18,76	47	3	1
98,77	3,333333333	5	5	3,75	5	5	5	3,75	2,666666667	1,75	1,666666667	3,5	4	3,75	4,125	3	2,5	12,49	16,68	999	6	3
98,8	3,333333333	4	3,666666667	3	3,5	5	5	3,5	3,5	1	1	3	4,5	5	3,5	3	4,25	11,5	23,97	31	6	3
98,8	3	3,333333333	3,333333333	3	4,25	3	4,5	4	3,25	1	1,5	3	3,75	4,5	4	1,666666667	1,75	11,3	18,22	69	3	2
98,82	2	1,666666667	2,666666667	1,5	2,5	2,666666667	4,5	3,25	2	1,5	1	1,333333333	2,25	2,75	3	2,666666667	3	11,28	21,3	999	1	1
99,14	3,333333333	4	4	4,25	4,75	3,25	5	4,75	3,25	1	1	1	3,75	4	5	2	4,25	11,32	18,49	69	5	3
99,16	5	5	5	4,25	5	5	5	4,75	3	1	1	1	3,5	5	4,142857143	4	5	999	999	999	5	3
99,25	4	4	4,333333333	3,25	4,75	4,5	5	5	5	1	1	1	5	5	4,25	2,333333333	1,25	999	999	999	5	3
99,31165802	2	2,666666667	2,666666667	2,75	3,5	4,5	4,75	4,5	4,5	1	1	2	5	5	4	3,333333333	2,5	11,59	18,26	45	3	2
99,34	3,666666667	4,666666667	3,666666667	5	5	5	5	5	5	1	1	1	5	5	4,5	1	4,75	10,02	18,26	41	5	3
99,45505879	2,333333333	3,666666667	3	3,75	3,5	5	5	3,5	3	1	1	1	3	4,25	3,375	1,333333333	1,75	999	999	999	3	2
99,52	4,666666667	4	4	4,5	3,75	5	3	4	3,5	1	1	1	5	4,666666667	4,375	3,666666667	2,5	11,66	15,81	59	5	3
99,56	4	4,333333333	2,666666667	3,25	4,25	4,75	5	5	4,75	1,75	2,25	1,666666667	2,75	5	4,125	2,666666667	3,5	12,02	18,49	27	4	3
99,81073214	2,333333333	2,666666667	3,333333333	2,5	4	3,25	4,75	3,75	4,75	1	1,333333333	1,666666667	4	5	3,875	2	1,75	13,02	16,25	41	3	2
99,83976646	4,333333333	4,333333333	4,333333333	3,5	3,75	4,25	4	4	2,25	1	1	1,666666667	3,75	4,5	3,125	3,666666667	1,25	11,82	21,29	45	2	2
100,1579534	3	2,666666667	3,333333333	2,5	4,75	3,5	4,25	4,25	3	1	1,75	2,666666667	4,25	4,25	3,125	3	2,5	10,97	999	43	3	2
100,2939026	4	4	4,666666667	3,25	3	2	3,5	2,75	1	1	1	1	3,75	2,75	3	2,333333333	3,75	12,93	32,99	48	2	2
100,3601432	3	3	2	3,75	4	4,75	4,5	4,25	4	2,5	3	3,333333333	5	4	4,25	3,666666667	4,75	999	999	999	6	3
100,9476812	4,666666667	4,666666667	4	4,5	3,5	4,5	4,25	3,75	4,25	2	3	2,666666667	4,25	4,75	3,875	3,333333333	4,5	10,09	16,78	69	6	3
101,0079649	3	3,333333333	3	3	3	4,25	5	5	4,75	1	1,5	2,666666667	2	4,5	2,375	2	2,5	11,23	16,38	999	3	2
101,17	2,333333333	2,333333333	2	2	3	2,666666667	4,75	3,25	2,5	1	1,75	1,333333333	4,25	5	4,125	3,666666667	4	11,39	22,13	68	3	2
101,4226226	3,666666667	3,666666667	4	4,75	5	3,75	5	5	4,75	1	1,5	3	4,5	5	4,5	2,666666667	3	11,23	14,05	36	6	3
101,47	3,333333333	2	1	1,5	2	1,75	5	3,25	3	1	1	1,333333333	4,75	5	2,75	2	4	999	23,46	48	3	1
101,4832653	3,666666667	4	4	3	3,5	4,25	4,5	3,25	3,5	1	2,5	1,333333333	2,75	4,25	3	1,666666667	2,25	11,74	20,22	27	2	1
101,7308156	4	4	4	4	3,75	4	4,75	3,5	4,25	1	1,5	2,666666667	3,75	4,75	4,125	3,333333333	2,5	10,37	21,68	26	4	3
101,7415937	4	5	3,666666667	4	5	4,5	5	4,75	3,5	1	2,5	3,666666667	5	4,75	3,75	4,333333333	4	999	16,77	27	6	3
101,7554198	4	3,666666667	4,666666667	3,5	2,5	5	5	4	3,5	1	2	3,333333333	4,5	4,5	3,75	1,666666667	3,25	10,46	15,42	31	2	2
102,1971244	3,666666667	3,333333333	3	4	4	4,75	4,5	3,5	3,75	2,5	2,5	2,666666667	3,5	3,25	1,125	2	2,25	12,25	999	68	1	1
102,2567976	3	4,666666667	3,666666667	2,75	3,25	4,75	5	3,5	4,25	1,75	2,5	3	3,25	3,5	3,75	1,666666667	2	12,46	26,88	52	2	2
102,39	4,666666667	3,666666667	4,333333333	4,25	4,75	4,5	5	4,75	5	1	1,5	1,333333333	4,25	5	4,875	4,333333333	4,5	11,73	17,78	53	5	3
102,4	4	3,666666667	3,333333333	4	3,5	4,25	4,5	2,25	3,25	1,25	3,25	3	5	4,25	4,25	1,666666667	3,75	11,6	16,34	999	6	3
102,4	3,333333333	3,5	3,666666667	4,5	3,75	3,5	4,25	3	3,5	1,75	2,75	3,333333333	4	4,75	3,5	2,666666667	3	999	999	51	6	3
102,82	2,666666667	2,333333333	2,333333333	2,25	2,5	2,75	4	2,25	2,5	2,25	1	1	3,5	3,75	3	1	2,333333333	11,59	15,37	41	1	1
103,12	2,666666667	3,666666667	3,333333333	3	3,25	3,75	2,5	3	3	2	1,5	1	2,5	1,5	1,625	1,333333333	1,75	11,04	16,45	55	1	1
103,2529857	3,666666667	4,333333333	3,666666667	3,5	3	3	5	3,5	2,5	2,25	3	1,333333333	3,25	4,25	3,25	1,333333333	1,25	10,96	999	41	1	1
103,5214129	1,666666667	2	2	1,25	3,25	4,5	4,25	3,5	4	1	1	1	3,75	4,25	3,25	3,333333333	2,5	11,78	17,96	33	3	2
103,5667261	3	4	4	2	4,5	5	5	4,75	5	1	1	4,333333333	5	5	5	2,333333333	4,25	12,6	20,51	47	6	3
103,5672367	3,666666667	3,666666667	3,333333333	3,25	3,75	1,75	5	4,25	2,25	1	1	1	2,75	5	4,625	3,666666667	3	999	999	999	2	2
103,6855718	3	4	4	4,25	3,5	4	4	3	2	1,25	1	2	4	4,25	2,125	2,333333333	1,75	12,02	22,98	49	2	1
104,37	1,666666667	3	2,333333333	2,5	3,5	3	3	3,5	2	1	1	1	2,25	3	2,625	1,666666667	2,75	11,23	15,79	72	1	1
104,54	3	3,666666667	4	3	3,25	3,5	4	4	2,5	1	1	1	3,25	4,5	4,125	2,333333333	4,25	11,44	20,09	27	2	2
104,54	4	4	4	3	3	3,25	4	2,75	2,75	1	1,5	1	3,25	5	4,875	3,333333333	3	11	15,37	27	2	2
104,76	1,666666667	2	2	2	4,75	3,75	5	4	4,25	1	1	1,666666667	5	5	4,5	1,333333333	3,25	999	20,98	51	3	2
104,87	3,333333333	4	4	4,25	4,5	4,25	4,5	4,5	4,75	2,5	3	2,333333333	4	5	4,25	2,666666667	4,5	11,44	17,87	33	6	3
104,9527349	5	5	4,333333333	4,5	4,25	4,5	5	4,5	2,75	3	1,25	2,333333333	4,75	5	3,25	2,333333333	2,25	11,5	16,79	23	5	3
105,0679003	2,333333333	2,666666667	3	2,75	2,75	3,25	3,5	3	1,75	1	1	1,333333333	2,75	3,5	2,75	2,666666667	2,5	999	999	999	1	1
105,3	4,333333333	4,666666667	5	4,75	3,5	5	4,75	4	5	1	2,75	1,666666667	4,25	4,5	3	3	3	999	999	999	6	3
105,33	3,666666667	3,666666667	4	3,5	4,666666667	5	5	5	3,666666667	1	3	1	3	5	4,25	4	3,75	999	15,94	89	5	3
105,39	3,333333333	4,333333333	4,666666667	3	3,25	3,5	5	3	2	1	1,5	2,333333333	3,25	4,25	3,125	3,666666667	2,25	11,26	999	33	2	2
105,43	3,333333333	4	3,666666667	3	2,5	5	5	3	2	1	1	1,666666667	4	4	4,5	3	4	11,49	27,44	46	2	2
105,4323365	4,666666667	5	4,666666667	4,25	4,5	5	5	4,75	4,5	1	1	1,333333333	3,25	4,75	4,375	3,666666667	3,5	11,21	999	56	5	3
105,67	4	3	2,666666667	3	3,5	5	5	3,5	1,75	1,5	2	2	2,75	3	2,25	1,333333333	1,25	10,16	14,6	54	1	1
105,67	3,666666667	3	4	4	4	4,25	4,25	3	2,5	1,75	2,25	2	3	3,333333333	3,25	2,666666667	3	999	15,02	48	2	1
105,67	2,5	3,666666667	3,666666667	3	3	4	3	2,5	3,25	1,75	2,333333333	2	3	3,75	2,375	3,333333333	1,5	999	999	999	1	1
105,9354872	2,666666667	2	3	2,5	3	3,25	4,25	3,5	2,75	1	1,75	1,333333333	4	5	3,875	3	2	12,69	17,49	34	3	2
106,5335478	4,333333333	3,666666667	4,666666667	2,75	3,25	5	4,75	3,75	4	3	2	1,333333333	4,75	4,5	3,875	3	2,25	12,18	24,71	17	2	2
106,62	4	4,333333333	3,666666667	4,5	4,25	4	4,5	4,25	3,75	1	1,5	2	4,5	4,75	3,25	1	2,25	10,97	19	47	2	2
106,62	4	3,333333333	3,333333333	3,5	3,5	3,75	4,25	4,25	4,5	1	1,5	3	4,25	4,75	2,875	2	2,25	11,12	19,59	38	3	2
106,7457441	4,333333333	4	4,333333333	2,5	4,75	3,75	2,25	3,75	1,5	1,25	1	1	3,75	4,25	3	1,666666667	1,5	12,73	20,2	33	2	1
106,8536722	4,333333333	4	4,333333333	4	5	4,5	5	5	4,25	1	1	1	4	5	4,5	4	4,5	11,65	999	68	5	3
106,89	2,666666667	5	4,333333333	1	3,75	5	4,75	3,75	4,75	1	1,5	1,333333333	3,75	5	4,125	2,333333333	4,25	11,91	999	77	4	2
107,33	5	5	5	5	5	5	5	5	4,25	1	1	1	4,25	4,75	4,875	3,666666667	4,25	11,51	17,73	60	5	3
107,5419817	2,666666667	3	4	2,75	3,75	3	4	3,5	2,5	1,75	1,75	2	2,75	3,25	3,25	2,333333333	1,25	13,86	20,31	41	1	1
107,5546524	1,666666667	2	2	2	2,5	3,25	2,75	2,5	2,25	3	2,5	1,333333333	2	2,25	1,75	1,333333333	1,5	12,07	19,67	70	1	1
107,7261118	2,333333333	1,666666667	1,666666667	2	2,25	3,5	3,75	2,25	2,25	2	2	1,333333333	1,25	2	2,375	2,666666667	1	12,56	22,66	54	1	1
107,7843916	2,666666667	3,333333333	4	2,75	2,75	3	3,25	2,666666667	2,25	1,75	2,25	3	3	3	2,375	1	1,75	12,26	25,87	999	1	1
108,07	3,333333333	2,333333333	3,333333333	3,25	4,25	4	3,75	4,5	3,25	1	1,25	2,333333333	4,25	4,75	4,125	2,333333333	2,5	11,19	19,91	49	3	2
108,09	3	3	3	3	3	3,25	5	4,25	3,25	1	1,75	3,666666667	4,75	4	3,375	3,333333333	3,75	11,09	16,22	65	4	3
108,11	4,666666667	5	5	3,25	4,75	4,75	4,75	4	4,5	1	1	1	5	5	3,625	4,333333333	1,75	11,08	16,69	999	5	3
108,1613209	4,333333333	4,333333333	4,333333333	4	3,666666667	4,75	4,75	3,5	3,25	1	1,5	1,666666667	3	3,5	4,125	2,666666667	3,5	11,19	14,34	69	2	2
108,56	5	5	5	4,75	3,75	5	5	4	5	1	1	3,666666667	5	5	4,875	3,666666667	3,75	11,4	999	999	6	3
108,56	5	4,666666667	4,666666667	4,75	3,75	5	5	3,25	5	1	1,5	2,333333333	4,5	5	4,75	4,333333333	5	10,93	16,82	67	5	3
108,56	5	5	4,333333333	3,75	4	5	4,75	4,5	4,5	1	2	2,666666667	4,5	5	4,375	2,333333333	3,25	999	999	999	6	3
108,56	5	4,666666667	4,333333333	4,25	2,25	3,5	5	4	4	1	2,25	3	4,75	5	4	2	3,5	11,6	16,7	73	6	3
108,74	3,333333333	4,333333333	3	3	3,75	2,75	4,5	4	3,5	1	1	2,333333333	4,25	4,75	4	2,666666667	2,75	11,77	14,93	999	4	2
108,79	3,333333333	3	2,666666667	3	3,5	3,5	3,5	2,75	1,75	1,5	3	1,333333333	1,75	2,75	2,375	2	1,75	999	15,77	60	1	1
109,1324289	3,333333333	2,666666667	3,333333333	3	4,75	2	4	4,75	2,75	2	1	2,666666667	4	4	2,75	1,333333333	2,5	11,1	16,82	68	3	2
109,51	3,333333333	4,666666667	4,5	3,5	3	4,25	4,5	3,25	3,75	1,75	2	1,666666667	3,75	3,75	3,375	2,666666667	2,25	11,68	15,46	56	2	2
109,9450683	3,666666667	4,333333333	4	2,5	3,5	4,25	4,75	4	2,75	2,75	1	1,666666667	2,5	2,5	2,875	2,333333333	1,5	10,83	17,89	69	1	1
110,36	1,666666667	4	4	1	1	5	4	1,666666667	3,25	2,333333333	2,5	2,333333333	2	2,75	2,75	2,333333333	4	11,44	999	20	1	1
110,43	3,333333333	4	3,666666667	3,75	3,25	5	5	3	3	1,5	1,333333333	4	4,5	4	3,375	2,666666667	2,5	10,15	21,79	15	2	2
110,4589335	4,666666667	4	4,5	3,75	5	4,5	4,75	5	4,25	1	1,75	1,333333333	3,25	4,5	4,75	4,333333333	3	10,32	15,89	53	5	3
110,5078364	4	4	3,666666667	3,75	4,5	3,5	4,333333333	4,75	3	1	1,25	1,333333333	5	5	5	3	4,25	999	999	999	5	3
110,6658984	2	2,333333333	2,333333333	2,25	2	2	3,75	2,25	2,75	2,75	3,75	1,666666667	2,5	2,25	2,625	1,333333333	1,25	12,33	28,32	58	1	1
110,7406604	3,666666667	4,333333333	4,333333333	3,5	4,5	4,75	5	4	2,25	1	1,25	2	2,75	4,25	4,25	2,333333333	3	11,21	20,59	36	5	2
111,08	4,666666667	4,333333333	5	4	3,666666667	4,75	3,75	3,25	2	1	2	1	3	4	3,25	1,666666667	2	11,04	17,7	72	2	2
111,16	4	4	3,666666667	4	4	4	4,5	4,25	3	1	1,25	2	3	4,25	4	1,666666667	3,25	11,51	19,37	33	2	2
111,4654888	2	2,333333333	3	2,25	2,333333333	4	3,75	3	1	1,25	1,5	1	3,5	3	2	2,5	1	999	999	999	1	1
111,71	3,333333333	3	3,333333333	2,75	3,5	2,5	2,25	3,5	4,5	1	1	1,666666667	3,5	5	3,125	2	3,5	11,22	999	81	3	1
111,7688858	4,333333333	4,333333333	4,666666667	3,5	5	3,75	4,75	4,75	4,5	1	1,75	2	4,5	4,5	4,625	3,333333333	4	11,43	18,96	16	5	3
111,8384388	5	5	5	4,5	3,25	4,25	3,5	3,5	2	1	1	1	3	5	4,5	2	3,25	11,97	16,97	999	2	2
112,0036492	3,333333333	3,666666667	3,333333333	1,75	1,5	1,75	5	1,75	1,75	1	2	2,333333333	3,5	2,5	2,5	3,333333333	1,5	999	999	999	1	1
112,05	2,333333333	4	3	2,75	3	3,5	4,75	2,25	3,5	1	1,5	1	4,5	4,25	3,875	2,333333333	2,25	11,44	999	41	3	2
112,0614764	4	4,335997581	4,116930975	3	4	3,333333333	4,75	4,25	3	1	2,75	3	3,75	5	4,625	1,333333333	1	11,82	23,83	40	2	2
112,33	3,333333333	3	2	3,75	3,25	4,5	5	3,5	5	1	3,75	3,666666667	4,5	4,25	3,875	1,666666667	2,75	11,51	23,47	41	6	3
112,71	5	5	4,666666667	3,75	3,5	4,5	4	4	2	1	1	2	3,75	4,75	4,375	4,666666667	4	11,19	14	999	5	3
112,91	3	2,666666667	2,666666667	3,5	3,25	5	4,5	2,75	1,25	2,5	4,75	3,666666667	2,75	2,25	3,875	4	3,75	11,44	999	47	1	1
113,33	3,333333333	3,666666667	3,666666667	3,25	2,75	3,75	3,75	3	2,75	2,5	2,5	4	3,75	3,75	3,125	3,666666667	2	12,47	22,25	45	1	1
113,6199919	4	5	5	4,5	4,5	4,25	5	4	1,75	1	1,25	1	3,25	4,75	3,125	1,666666667	1,5	12,56	19,38	999	2	2
113,84	2	4,333333333	3	2,75	4,25	5	5	5	4,5	1	1,5	1,333333333	5	5	3,5	4,333333333	2,75	999	999	999	4	2
113,9226733	2,666666667	2,666666667	3,333333333	2	3	4,25	4,5	4	3,5	1,75	1,75	1	2,5	3,75	4,25	2	2,25	11,13	18,71	41	3	1
114,93	4	4	3,666666667	3,25	4,5	3,25	4,75	4	2,5	1	1,25	1	2,75	4,5	4	3,333333333	3,25	12,31	25,28	35	2	2
114,93	4	4	3,666666667	4,25	4	4,5	4	3,666666667	2,25	1	1,5	1	3,5	4,25	3,285714286	1,666666667	2,75	11,84	18,67	59	2	2
114,94	1,666666667	1,333333333	2	1,5	2,5	4,25	4,75	3,25	3,25	1	1	1	4,75	5	4,75	2,333333333	2,75	11,88	18,07	63	3	2
115	2	3,333333333	3	2,25	3,5	2,75	4,75	4,25	2,5	1	1,75	2,333333333	3,5	5	4,428571429	3	3	12,22	20,96	53	3	2
115,0612578	4,666666667	4,666666667	4,666666667	4,25	4,75	2	4	4,75	1	1	1	2,333333333	5	4	3,75	2,333333333	2,5	999	999	999	2	2
115,43	4	5	5	4,25	3,5	4,25	5	4,5	4,75	1	2,5	3,666666667	5	5	4,875	4	4,5	11,75	20,17	29	6	3
115,8138772	3	2,666666667	2,333333333	4	4,25	4	5	4,75	3,75	1,5	3,5	2	4	5	4,5	3,666666667	3,5	999	999	999	4	3
116,15	4	3,333333333	2,333333333	3,5	3	4,5	5	3,25	3,75	2	1,5	2,666666667	4,25	5	3,625	2	2,75	11,44	999	46	3	2
116,7677908	4	3,333333333	3	1,75	2,5	4	4,75	3,75	4,5	1,25	2,5	2	4,25	4,75	3,75	2,434392211	3,137564918	11,54	25,44	27	3	2
117,0090031	3,333333333	4,333333333	3,666666667	3,5	3,5	3	5	4,75	3	1	1	1	3,75	5	4,625	2,5	3,25	12,11	999	47	4	2
117,14	4,333333333	4,666666667	4	4	4,25	3,5	5	4,75	3	1	1	2,333333333	4,5	5	4	2,666666667	3,25	11,49	13,35	72	5	3
117,21	3,666666667	4,666666667	4,666666667	4,25	5	4,5	4,25	5	4	1	3,25	2,666666667	5	5	3,875	2,666666667	4	11,45	17,58	60	6	3
117,3733753	4,666666667	5	4,666666667	4	5	5	5	4,5	2,5	1	1	1	4,5	5	4,125	1,666666667	1,25	999	19,07	34	5	3
118,7041463	2	2	2,666666667	3,75	3,75	4	5	4,5	4,5	1,75	1,25	1,666666667	3,5	5	3,25	3	2,5	11,36	20,6	69	3	2
118,76	2	3	3	1,75	3	3	4,75	3	3,25	1	1,25	2,666666667	2,5	3,75	2	1,333333333	1,25	11,58	18,41	26	1	1
118,76	2	3	3,666666667	3	2,75	3	4,75	3	3,333333333	1	1,5	1,333333333	3	3,5	1,625	1	1,666666667	11,58	14,29	67	1	1
118,76	2,333333333	3	3	2,75	2,75	3	4	2,75	2	1	1,5	2,666666667	3	4,25	1,875	1	2,5	11,44	19,59	26	1	1
120,69	4,666666667	5	4,333333333	3,333333333	4,5	4,25	3,75	3,75	3,75	3	2,5	2	2,75	2,5	4	1	2,75	11,82	16,92	29	2	2
120,74	3,666666667	4,666666667	4	4,75	5	5	5	5	4,75	1	2	2	5	5	4,75	4,333333333	4,75	11,12	14,81	51	5	3
123,91	1,333333333	2,666666667	2	1,5	4,75	3,25	5	5	3,25	1	1	1,333333333	4,75	4,5	4,125	2,333333333	3	11,44	999	49	3	2
124,35	4	4,333333333	3,666666667	4	4,5	2,75	4	4,5	3,5	1	1	1	5	5	4,5	1,666666667	2,5	11,89	14,42	71	5	3
124,4405901	3,333333333	3	3	3	4,25	5	5	5	4	1	1	2,333333333	5	5	5	5	4,75	11,44	999	41	4	3
126,6547214	2	3	2	2,75	4,5	5	4,75	4,75	5	1	1,5	1,666666667	3,75	5	4,875	3,666666667	4,5	11	16,76	47	4	2
126,75	3,333333333	4,333333333	4	3,25	4,25	4,5	5	4,5	3,5	1	1	1	4,5	5	4,25	3	3,75	11,75	16,33	71	5	3
129,25	3,666666667	3	3	5	4	4	4,75	4,25	4,5	1	3	5	5	5	4	3,666666667	3,75	11,9	22,57	51	6	3
129,56	4,666666667	5	4,333333333	5	4,25	4,5	5	4,5	3,75	1	1	1	3,75	5	4,625	4,333333333	5	11,47	14,61	68	5	3
130,26	3	4	3,666666667	4,5	4,5	3,75	5	4,75	5	1	2,75	3	5	5	4,5	2,666666667	3,25	999	999	43	6	3
130,47	3,666666667	3	2,666666667	4	3,5	4,5	4,5	3,75	4,25	1	1,75	3	4,75	4,25	2,875	3	2,25	11,82	24,58	40	4	2
130,47	3,333333333	4,666666667	4,333333333	3,25	3,75	4,25	4,5	3,5	3,5	1	2,25	2,666666667	4	4,75	3,5	2	4,75	12,3	18,53	999	6	3
130,47	3,666666667	4	4,666666667	3,5	4,5	4	4,25	4	4	1,25	2,5	2,333333333	3,5	4,25	3,375	3,666666667	3	12,15	16,37	999	5	3
130,47	4	5	5	3,75	3,75	3,75	4,5	4	3,75	1,25	2,5	3	4,75	4,5	3,625	2	3,75	11,09	20,95	41	6	3
131,1584489	4	4,333333333	3,666666667	3	4,25	4,5	5	4,5	4,25	1	1,25	1,666666667	5	5	4,125	3	3,75	11,39	17,73	57	5	3
131,6981334	3,666666667	3,333333333	3,666666667	3,5	5	4,5	4,5	5	4,5	1	1	2,333333333	5	4,75	3,125	2,333333333	4	11,37	17,85	999	4	3
131,7586025	3,666666667	3,666666667	5	3	5	5	5	5	4,5	1	1	2	4,25	5	5	3,333333333	4	11,32	17,21	52	5	3
132,43	4,666666667	5	4,666666667	3,75	4,5	5	5	4,75	4,5	1	1	1	5	4,75	4,375	3,666666667	3	11,58	999	56	5	3
136,4884317	2,666666667	4	3	2,75	3,5	1,75	5	4,75	4,75	1	1	1	4,5	5	4,75	3,333333333	3,5	11,22	17,01	45	4	2
137,5	4	4,5	5	4,25	4,25	4,25	4,75	4,75	3	1	1	1,333333333	4,75	5	4,625	4	4,25	11,44	999	999	5	3
137,5	5	5	5	5	5	5	5	5	5	1	1	2,333333333	5	5	4,625	4,333333333	4,5	11,23	13,7	69	5	3
138,37	3	5	4,666666667	4,5	5	5	5	5	5	1	4	5	4,5	5	4,75	2,666666667	4	11,44	16,6	27	6	3
141,74	3	4	3	3	4,25	4	5	4,5	3	1,75	1	1,333333333	4,5	4,25	3,125	3	2	11,93	16,63	45	4	2
153,67	2,333333333	3	1	4,5	5	1	5	5	5	1	1	1	4	5	3,75	5	3,5	12,02	20,25	43	4	2
